# Supplementary material for: Scc2 regulates gene expression by recruiting cohesin to the chromosome as a transcriptional activator during yeast meiosis
Source: PubMed Central journal article supplement — Mol Biol Cell. 2011 Jun 15;22(12):1985–96. doi: 10.1091/mbc.E10-06-0545 (PMC3113765; doi:10.1091/mbc.e10-06-0545), 2011-06-15

SUPPLEMENTAL INFORMATION

SUPPLEMENTAL Table 1. Yeast strains used in this study.

| Strains | Genotype                                                                                                                                                                                                                 |
|---------|--------------------------------------------------------------------------------------------------------------------------------------------------------------------------------------------------------------------------|
| HY1279  | <i>his4, ura3, leu2, P<sub>CLB2</sub>-SCC2 ::KAN/arg4-Nsp, ura3, leu2, P<sub>CLB2</sub>-SCC2 ::KAN</i>                                                                                                                   |
| HY1294C | <i>arg4-Nsp, ura3, leu2, his4, lys2, ho::LYS2/ura3::tetOx224::URA3, leu2::tetR-GFP::LEU2, lys2, ho::LYS2</i>                                                                                                             |
| HY1336  | <i>arg4-Nsp, ura3, lys2, ho::LYS2, DEC82-URA3-DED81, P<sub>CLB2</sub>-SCC2 ::KAN/ura3, lys2, ho::LYS2, arg4-Bgl, P<sub>CLB2</sub>-SCC2 ::KAN</i>                                                                         |
| HY1370  | <i>ura3, leu2, his3, SCC2-3HA::HIS5/ura3, leu2, his3, SCC2-3HA::HIS5</i>                                                                                                                                                 |
| HY1499  | <i>his4, leu2, spo11-Y135F::HB, REC8-3HA::URA3, lys2, ho::LYS2/his4, leu2, spo11-Y135F::HB, REC8-3HA::URA3, lys2, ho::LYS2</i>                                                                                           |
| HY1503C | <i>arg4, his4, leu2, REC8-3HA::URA3/leu2, REC8-3HA::URA3</i>                                                                                                                                                             |
| HY1586  | <i>leu2, ura3, his4-x, trp1, REC8-3HA::URA3, P<sub>CLB2</sub>-SCC2 ::KAN/leu2, ura3, his4-x, trp1, REC8-3HA::URA3, P<sub>CLB2</sub>-SCC2 ::KAN</i>                                                                       |
| HY1644  | <i>leu2, SCC2-V5::HIS5, REC8-3HA::URA3, ndt80Δ::CLONAT, lys2, ho::LYS2/leu2, SCC2-V5::HIS5, REC8-3HA::URA3, ndt80Δ::CLONAT, lys2, ho::LYS2</i>                                                                           |
| HY1750  | <i>leu2, ura3, SMC3-3HA::HIS5, P<sub>CLB2</sub>-SCC2 ::CLONAT, lys2, ho::LYS2/his4, ura3, leu2, P<sub>CLB2</sub>-SCC2 ::KAN, lys2, ho::LYS2</i>                                                                          |
| HY1750C | <i>leu2, ura3, SMC3-3HA::HIS5, lys2, ho::LYS2 /his4, ura3, leu2, lys2, ho::LYS2</i>                                                                                                                                      |
| HY1975  | <i>leu2, REC8-3HA::URA3, spo11-Y135F::HB, P<sub>CLB2</sub>-SCC2 ::CLONAT, lys2, ho::LYS2/leu2, arg4, his4, REC8-3HA::URA3, spo11-Y135F::HB, P<sub>CLB2</sub>-SCC2 ::CLONAT, lys2, ho::LYS2</i>                           |
| HY2020  | <i>arg4, leu2, SCC2-GFP::HIS5, REC8-3HA::URA3, lys2, ho::LYS2/arg4, leu2, SCC2-GFP::HIS5, REC8-3HA::URA3, lys2, ho::LYS2</i>                                                                                             |
| HY2107  | <i>his4, ura3, leu2::PREC8-GFP::REC8, P<sub>CLB2</sub>-SCC2 ::KAN/arg4-Nsp, ura3, leu2::PREC8-GFP::REC8, P<sub>CLB2</sub>-SCC2 ::KAN</i>                                                                                 |
| HY2109  | <i>his4, ura3, leu2::PREC8-GFP::LEU2, rec8Δ::KAN, lys2, ho::LYS2/arg4, ura3, leu2::P<sub>REC8</sub>-GFP::LEU2, rec8Δ::Kan, lys2, ho::LYS2</i>                                                                            |
| HY2113  | <i>his4, ura3, leu2, P<sub>CLB2</sub>-SCC2 ::KAN, lys2, ho::LYS2/ura3::tetOx224::URA3, leu2::tetR-GFP::LEU2, P<sub>CLB2</sub>-SCC2 ::CLONAT, lys2, ho::LYS2</i>                                                          |
| HY2115  | <i>ura3::tetOx224::URA3, leu2::tetR-GFP::LEU2, P<sub>CLB2</sub>-SCC2 ::CLONAT, ndt80Δ::HB, lys2, ho::LYS2/his4, ura3, leu2, P<sub>CLB2</sub>-SCC2 ::KAN, ndt80Δ::CLONAT, lys2, ho::LYS2</i>                              |
| HY2122  | <i>leu2, ura3, his4, trp1, P<sub>CUP1</sub>-REC8-3HA::URA3, P<sub>CLB2</sub>-SCC2 ::CLONAT, lys2, ho::LYS2/leu2, ura3, his4-x, trp1, P<sub>CUP1</sub>-REC8-3HA::URA3, P<sub>CLB2</sub>-SCC2 ::CLONAT, lys2, ho::LYS2</i> |
| HY2130  | <i>ura3::tetOx224::URA3, leu2::tetR-GFP::LEU2, ndt80::HB/his4, ura3, leu2, ndt80::Kan</i>                                                                                                                                |

---

|        |                                                                                                                                                                                                                       |
|--------|-----------------------------------------------------------------------------------------------------------------------------------------------------------------------------------------------------------------------|
| HY2157 | <i>his4-x, ura3, lys2, ho::LYS2, leu2::hisG, P<sub>REC8</sub>-GFP::LEU2/leu2-k, arg4-Nsp, ura3, lys2, ho::LYS2, P<sub>REC8</sub>-GFP::LEU2</i>                                                                        |
| HY2203 | <i>his4-x, ura3, lys2, ho::LYS2, leu2::hisG, P<sub>REC8</sub>-GFP::REC8/leu2-k, arg4-Nsp, ura3, lys2, ho::LYS2, P<sub>REC8</sub>-GFP::REC8</i>                                                                        |
| HY2229 | <i>his4, ura3, leu2, rec8Δ::Kan, leu2::P<sub>REC8</sub>-GFP::LEU2/arg4-Nsp, ura3, leu2, rec8Δ::KAN, leu2::P<sub>REC8</sub>-GFP::LEU2</i>                                                                              |
| HY2279 | <i>his4, ura3, leu2, P<sub>CLB2</sub>-SCC2 ::KAN, P<sub>REC8</sub>-GFP::LEU2, lys2, ho::LYS2/arg4-Nsp, ura3, leu2, P<sub>CLB2</sub>-SCC2 ::KAN, P<sub>REC8</sub>-GFP::LEU2, lys2, ho::LYS2</i>                        |
| HY2280 | <i>his4-x, ura3, lys2, ho::LYS2, P<sub>REC8</sub>-GFP::LEU2/arg4-Nsp, ura3, lys2, ho::LYS2, P<sub>REC8</sub>-GFP::LEU2</i>                                                                                            |
| HY2285 | <i>his4, ura3, P<sub>CLB2</sub>SCC3::KAN, lys2, ho::LYS2, leu2::P<sub>REC8</sub>-GFP::LEU2/arg4, ura3, lys2, ho::LYS2, P<sub>CLB2</sub>SCC3::KAN, leu2::P<sub>REC8</sub>-GFP::LEU2</i>                                |
| HY2301 | <i>his4-x, ura3, lys2, ho::LYS2, leu2::hisG, P<sub>REC8</sub>-GFP::LEU2, P<sub>CLB2</sub>-SCC2 ::KAN/his3Δ200, leu2-k, ura3, lys2, ho::LYS2, TUB4-mApple::HIS5, P<sub>REC8</sub>-GFP::LEU2, P<sub>CLB2</sub>-SCC2</i> |
| HY2464 | <i>his4-x, ura3, lys2, ho::LYS2, leu2::hisG, P<sub>DMC1</sub>-GFP::LEU2/leu2-k, arg4-Nsp, ura3, lys2, ho::LYS2, P<sub>DMC1</sub>-GFP::LEU2</i>                                                                        |
| HY2465 | <i>arg4-Nsp, ura3, leu2, P<sub>CLB2</sub>-SCC2 ::KAN, P<sub>DMC1</sub>-GFP::LEU2/his4, ura3, leu2, P<sub>CLB2</sub>-SCC2 ::KAN, P<sub>DMC1</sub>-GFP::LEU2</i>                                                        |
| HY2471 | <i>leu2, ura3, SCC2-GFP::HIS5, rec8Δ::KAN/leu2, ura3, SCC2-GFP::HIS5, rec8Δ::KAN</i>                                                                                                                                  |
| HY2500 | <i>arg4-Nsp, ura3, leu2, P<sub>REC8</sub>-MCD1::rec8Δ, lys2, ho::LYS2/his4, ura3, leu2, P<sub>REC8</sub>-MCD1::rec8Δ, lys2, ho::LYS2</i>                                                                              |
| HY2502 | <i>arg4-Nsp, ura3, leu2, P<sub>CLB2</sub>-SCC2 ::KAN, P<sub>REC8</sub>-MCD1::rec8Δ, lys2, ho::LYS2/his4, ura3, leu2, P<sub>CLB2</sub>-SCC2 ::KAN, P<sub>REC8</sub>-MCD1::rec8Δ, lys2, ho::LYS2</i>                    |
| HY2636 | <i>arg4, ura3, leu2, P<sub>CLB2</sub>SCC3::KAN, tetR-SCC3::URA3/his4, ura3, leu2, P<sub>CLB2</sub>SCC3::KAN, tetR-SCC3::URA3</i>                                                                                      |
| HY2664 | <i>his4-x, ura3, lys2, ho::LYS2, leu2::hisG, P<sub>DMC1</sub>-mApple::LEU2/leu2-k, arg4-Nsp, ura3, lys2, ho::LYS2, P<sub>REC8-2158</sub>-GFP::LEU2</i>                                                                |
| HY2665 | <i>his4-x, ura3, lys2, ho::LYS2, leu2::hisG, P<sub>DMC1</sub>-mApple::LEU2/leu2-k, arg4-Nsp, ura3, lys2, ho::LYS2, P<sub>REC8-1297</sub>-GFP::LEU2</i>                                                                |
| HY2666 | <i>his4-x, ura3, lys2, ho::LYS2, leu2::hisG, P<sub>DMC1</sub>-mApple::LEU2/leu2-k, arg4-Nsp, ura3, lys2, ho::LYS2, P<sub>REC8-698</sub>-GFP::LEU2</i>                                                                 |
| HY2684 | <i>leu2, ura3, his4-x, REC8-3HA::URA3, P<sub>CLB2</sub>-SCC2 ::NAT, 10xtetO-P<sub>REC8</sub>-GFP::LEU2/his4, ura3, leu2, P<sub>CLB2</sub>-SCC2 ::KAN, tetR-SCC3::URA3</i>                                             |
| HY2685 | <i>his4, ura3, leu2, P<sub>CLB2</sub>-SCC2 ::KAN/arg4-Nsp, ura3, leu2, P<sub>CLB2</sub>-SCC2 ::KAN, 10xtetO-P<sub>REC8</sub>-GFP::LEU2</i>                                                                            |
| HY2692 | <i>his4, ura3, leu2, P<sub>CLB2</sub>-SCC2 ::KAN, tetR-SCC3::URA3/arg4-Nsp, ura3, leu2, P<sub>CLB2</sub>-SCC2 ::KAN, P<sub>REC8</sub>-GFP::LEU2</i>                                                                   |
| HY2930 | <i>leu2, ura3, his4-x, trp1, KAN::P<sub>DMC1</sub>-REC8-3HA::URA3, P<sub>CLB2</sub>-SCC2 ::NAT/his4, ura3, leu2, P<sub>CLB2</sub>-SCC2 ::KAN</i>                                                                      |
| HY2931 | <i>leu2, ura3, his4-x, trp1, KAN:P<sub>DMC1</sub>-REC8-3HA::URA3/leu2-k, arg4-</i>                                                                                                                                    |

---

|                   |                                                                                                                                                                                                                      |
|-------------------|----------------------------------------------------------------------------------------------------------------------------------------------------------------------------------------------------------------------|
|                   | <i>Nsp, ura3</i>                                                                                                                                                                                                     |
| HY2952            | <i>his4-x, ura3, lys2, ho::LYS2, leu2::hisG, P<sub>DMC1</sub>-mApple::LEU2/his3Δ200, leu2-k, ura3, lys2, ho::LYS2, P<sub>REC8</sub>-GFP::bud3::HIS5</i>                                                              |
| HY2953            | <i>his4-x, ura3, lys2, ho::LYS2, leu2::hisG, P<sub>DMC1</sub>-mApple::LEU2/leu2-k, arg4-Nsp, ura3, lys2, ho::LYS2, P<sub>REC8</sub>-GFP::dcl1::LEU2</i>                                                              |
| HY3044            | <i>his4, ura3, leu2, P<sub>CLB2</sub>-SCC2::KAN, P<sub>DMC1</sub>-mApple::LEU2/arg4-Nsp, ura3, leu2, P<sub>CLB2</sub>-SCC2::KAN, 10xtetO-P<sub>REC8</sub>-GFP::LEU2</i>                                              |
| HY3045            | <i>his4, ura3, leu2, P<sub>CLB2</sub>-SCC2::KAN, P<sub>URA3</sub>-tetR-SCC3::URA3, P<sub>DMC1</sub>-mApple::LEU2/arg4-Nsp, ura3, leu2, P<sub>CLB2</sub>-SCC2::KAN, 10xtetO-P<sub>REC8</sub>-GFP::LEU2</i>            |
| HY3046            | <i>his4, ura3, leu2, P<sub>CLB2</sub>-SCC2::KAN, P<sub>DMC1</sub>-mApple::LEU2/arg4-Nsp, ura3, leu2, P<sub>CLB2</sub>-SCC2::KAN, P<sub>REC8</sub>-GFP::DCC1, 10xtetO::LEU2</i>                                       |
| HY3047            | <i>his4, ura3, leu2, P<sub>CLB2</sub>-SCC2::KAN, P<sub>URA3</sub>-tetR-SCC3::URA3, P<sub>DMC1</sub>-mApple::LEU2/arg4-Nsp, ura3, leu2, P<sub>CLB2</sub>-SCC2::KAN, P<sub>REC8</sub>-GFP::DCC1, 10xtetO::LEU2</i>     |
| HY3100            | <i>his4-x, ura3, lys2, ho::LYS2, leu2::hisG, P<sub>DMC1</sub>-mApple::LEU2/leu2-k, arg4-Nsp, ura3, lys2, ho::LYS2, 10xtetO-P<sub>REC8</sub>-GFP::LEU2</i>                                                            |
| HY3214            | <i>his4-x, ura3, lys2, ho::LYS2, leu2::hisG, P<sub>HIMI</sub>-GFP::HIMI/leu2-k, arg4-Nsp, ura3, lys2, ho::LYS2, P<sub>HIMI</sub>-GFP::HIMI</i>                                                                       |
| HY3215            | <i>his4, ura3, leu2, P<sub>CLB2</sub>-SCC2::KAN, P<sub>HIMI</sub>-GFP::HIMI/arg4-Nsp, ura3, leu2, P<sub>CLB2</sub>-SCC2::KAN, P<sub>HIMI</sub>-GFP::HIMI</i>                                                         |
| HY3231            | <i>his4-x, ura3, lys2, ho::LYS2, leu2::hisG, P<sub>HIMI</sub>-GFP::LEU2/leu2-k, arg4-Nsp, ura3, lys2, ho::LYS2, P<sub>HIMI</sub>-GFP::LEU2</i>                                                                       |
| HY3233            | <i>his4, ura3, leu2, P<sub>CLB2</sub>-SCC2::KAN, P<sub>HIMI</sub>-GFP::LEU2/arg4-Nsp, ura3, leu2, P<sub>CLB2</sub>-SCC2::KAN, P<sub>HIMI</sub>-GFP::LEU2</i>                                                         |
| HY3243            | <i>his4-x, ura3, lys2, ho::LYS2, leu2::hisG, P<sub>CLB2</sub>-SMC1::KAN, P<sub>URA3</sub>-tetR-SCC3::URA3/his3Δ200, leu2-k, ura3, lys2, ho::LYS2, P<sub>CLB2</sub>-SMC1::KAN, 10xtetO-P<sub>REC8</sub>-GFP::LEU2</i> |
| HY3254            | <i>his4, ura3, leu2, P<sub>CLB2</sub>-SCC2::KAN, P<sub>URA3</sub>-tetR-SCC3::URA3/leu2, ura3, his4-x trp1, 10xtetO-REC8-3HA::URA3, P<sub>CLB2</sub>-SCC2::KAN</i>                                                    |
| HY3255            | <i>his4, ura3, leu2, P<sub>CLB2</sub>-SCC2::KAN/leu2, ura3, his4-x, trp1, 10xtetO-REC8-3HA::URA3, P<sub>CLB2</sub>-SCC2::KAN</i>                                                                                     |
| HY3284            | <i>arg4, leu2-k, ura3, lys2, ho::LYS2, P<sub>CLB2</sub>-SMC1::KAN/his3Δ200, leu2-k, ura3, lys2, ho::LYS2, P<sub>CLB2</sub>-SMC1::KAN, 10xtetO-P<sub>REC8</sub>-GFP::LEU2</i>                                         |
| HY1869<br>(S288C) | <i>MATa, ura3, leu2, his3, TDEGRON-SCC2-V5::HIS5</i>                                                                                                                                                                 |
| 3050              | <i>arg4-Nsp, ura3, leu2, SCC2-3HA::KAN/his4, ura3, leu2, SCC2-3HA::KAN</i>                                                                                                                                           |
| 3200              | <i>arg4, ura3, leu2, P<sub>CLB2</sub>-SCC3::KAN/his4, ura3, leu2, P<sub>CLB2</sub>-SCC3::KAN</i>                                                                                                                     |
| 3220              | <i>his4, ura3, leu2, rec8Δ::HB/arg4, ura3, leu2, rec8Δ::HB</i>                                                                                                                                                       |
| NH144             | <i>arg4-Nsp, ura3, leu2, lys2, ho::LYS2/his4, ura3, leu2, lys2, ho::LYS2</i>                                                                                                                                         |

Supplemental Table 2. PCR primers used in this study.

| Primer name                    | Primer sequence                                                                  |
|--------------------------------|----------------------------------------------------------------------------------|
| <i>SCC2-TAGF1</i>              | <i>CATCAAATGGCAAGCTTCTTACATATTTTAGAAAACACGTGAAGGATACGGCGGCCGCTCTAGAAGCTAGTAG</i> |
| <i>SCC2-TAGR1</i>              | <i>AATGCAAAATGATTATTAATACTATGTATATTTTAAGTGCAATATATTTATCGACGGTATCGATAAGCTTC</i>   |
| <i>P<sub>CLB2</sub>-SCC2F1</i> | <i>GTATTGTTCTTATAACTATTCATTTTTTGAAAGAATTGGCGCTAGCAGCATAGGCCACTAGTGGATCTG</i>     |
| <i>P<sub>CLB2</sub>-SCC2R1</i> | <i>CCTCTATTATTCTTCCAGGAATATTCTTGTCTTTCCCTGGGTACGACATAGCAGCGTAATCTGGAACGTC</i>    |
| <i>ndt80ΔF1</i>                | <i>GATGGCACCCTTCGAATTATTTTCGACAAAAGGAACTAAAAATTGCCCTCAGGGGCATGATGTGACT</i>       |
| <i>ndt80ΔR1</i>                | <i>GAAAGGGAGAGTTCGTTACCATAGCTTGTTTTGCATTCAGAACGTGAGCAGCTCGTTTTTCGACACTGGAT</i>   |
| <i>REC8PROBEF1</i>             | <i>AATCACCTGCTTGTGCAGTT</i>                                                      |
| <i>REC8PROBER1</i>             | <i>TCTTCCAAAACCTTGAAGGAGG</i>                                                    |
| <i>IME1PROBEF1</i>             | <i>CAAAATTGCCTCATCTCAGC</i>                                                      |
| <i>IME1PROBER1</i>             | <i>TCAACGTCGAAGGCAATTTC</i>                                                      |
| <i>ACT1PROBEF1</i>             | <i>TTTCTCCACCACTGCTGAAA</i>                                                      |
| <i>ACT1PROBER1</i>             | <i>TCATGGAAGATGGAGCCAAA</i>                                                      |
| <i>SCC2PROBEF1</i>             | <i>CAACGACAATTCTTCCAACAA</i>                                                     |
| <i>SCC2PROBER1</i>             | <i>TTCATCAGCAAGTCGCTAAAG</i>                                                     |
| <i>DEGRON-SCC2F1</i>           | <i>GTATTGTTCTTATAACTATTCATTTTTTGAAAGAATTGGCGGCTAGCAATGCTTCCGGCTCGTATGTT</i>      |
| <i>DEGRON-SCC2R1</i>           | <i>CCTCTATTATTCTTCCAGGAATATTCTTGTCTTTCCCTGGGTACGACATGGTACCGTCTTTCTTCTCGT</i>     |
| <i>SMC3TAGF1</i>               | <i>AGAAGAAGCAATCGGATTCATTAGAGGTAGCAATAAATTCGCTGAAGTCGCCGCTCTAGAAGCTAGTGGA T</i>  |
| <i>SMC3TAGR1</i>               | <i>GTAAGCAAAACTGATATTTTTATATACAAATCGTTTCAAATATCTCTTATCGACGGTATCGATAAGCTTC</i>    |
| <i>GFPPROBEF1</i>              | <i>TGGAGTTGTCCCAATTCTTG</i>                                                      |
| <i>GRPPROBER1</i>              | <i>CCATCGCCAATTGGAGTATT</i>                                                      |

Supplemental Figure 1

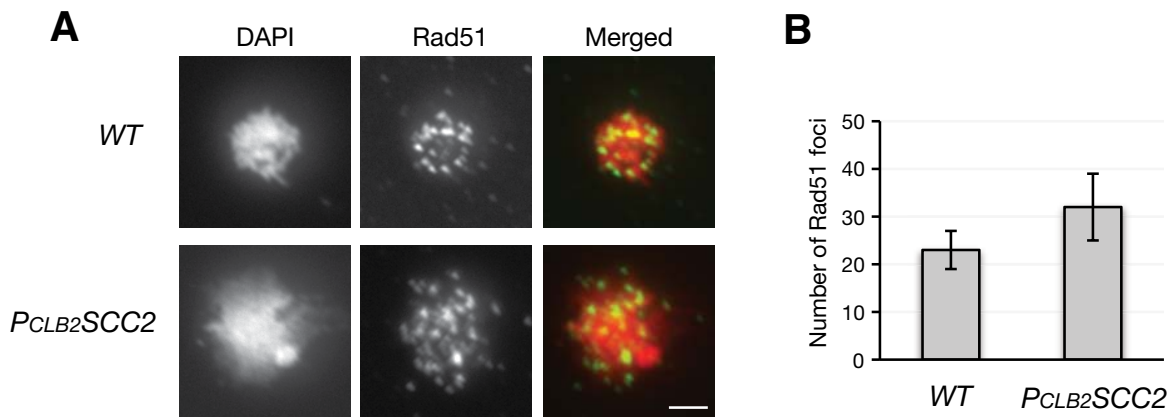

## Supplemental Figure 2

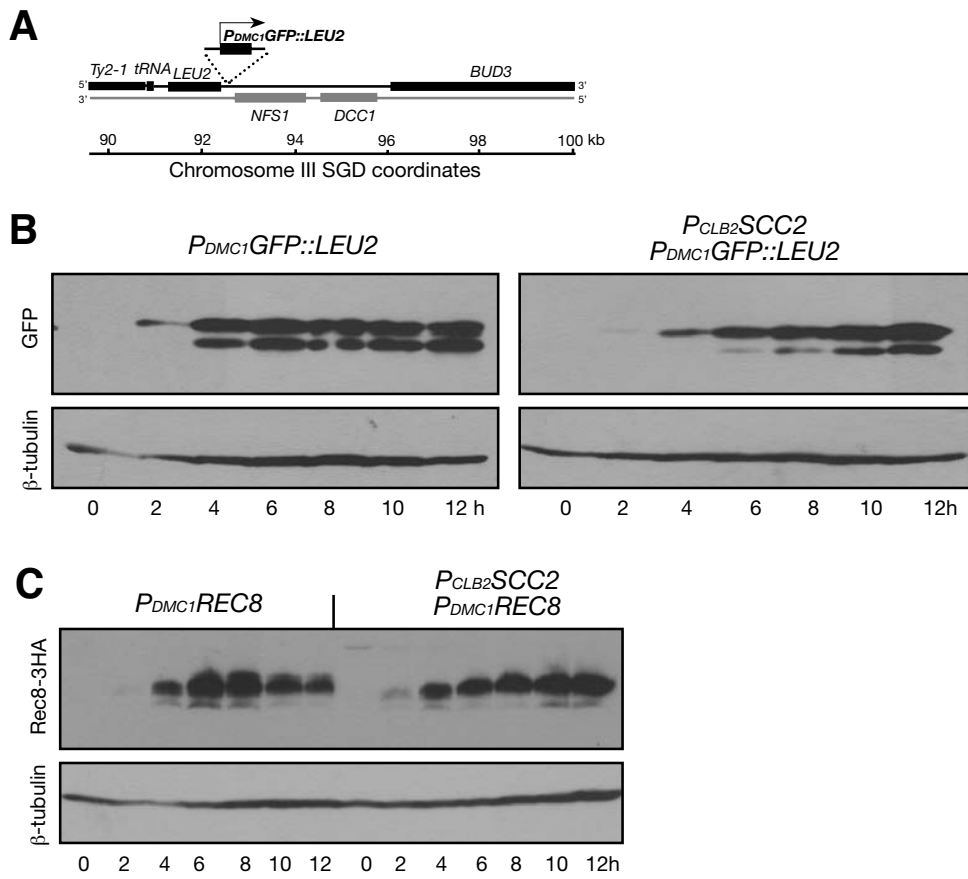

Supplemental Figure 3

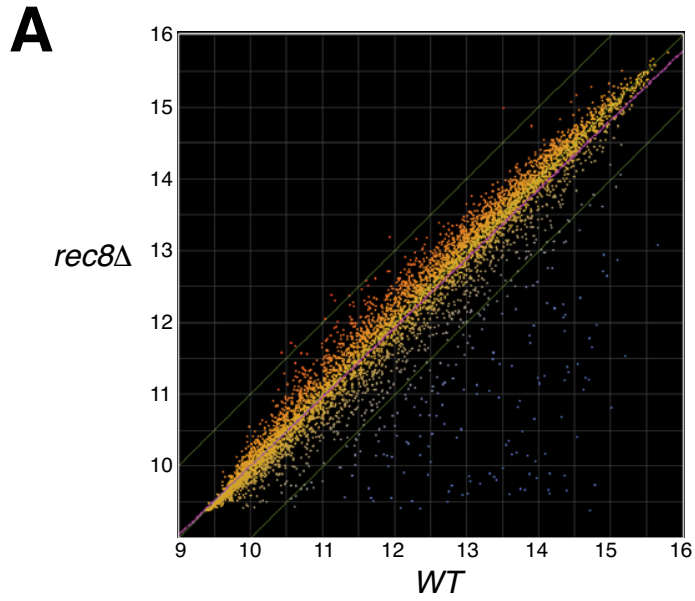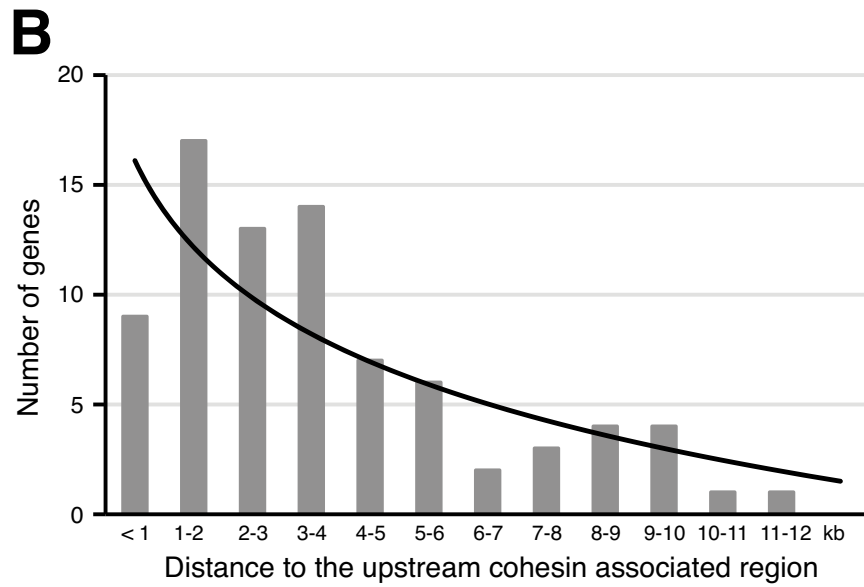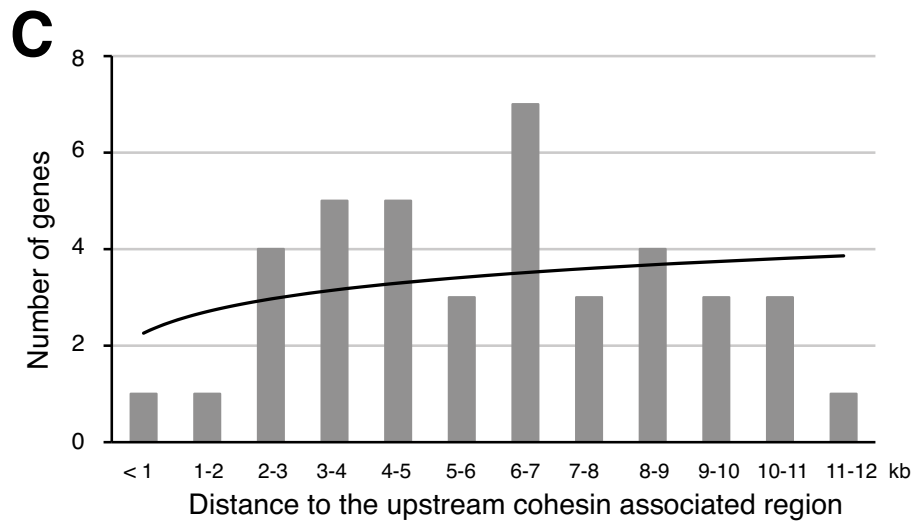

Supplemental Figure 4

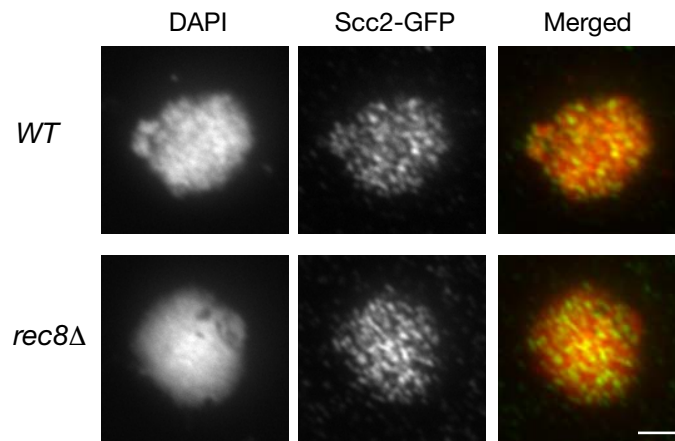



Supplemental Figure 5

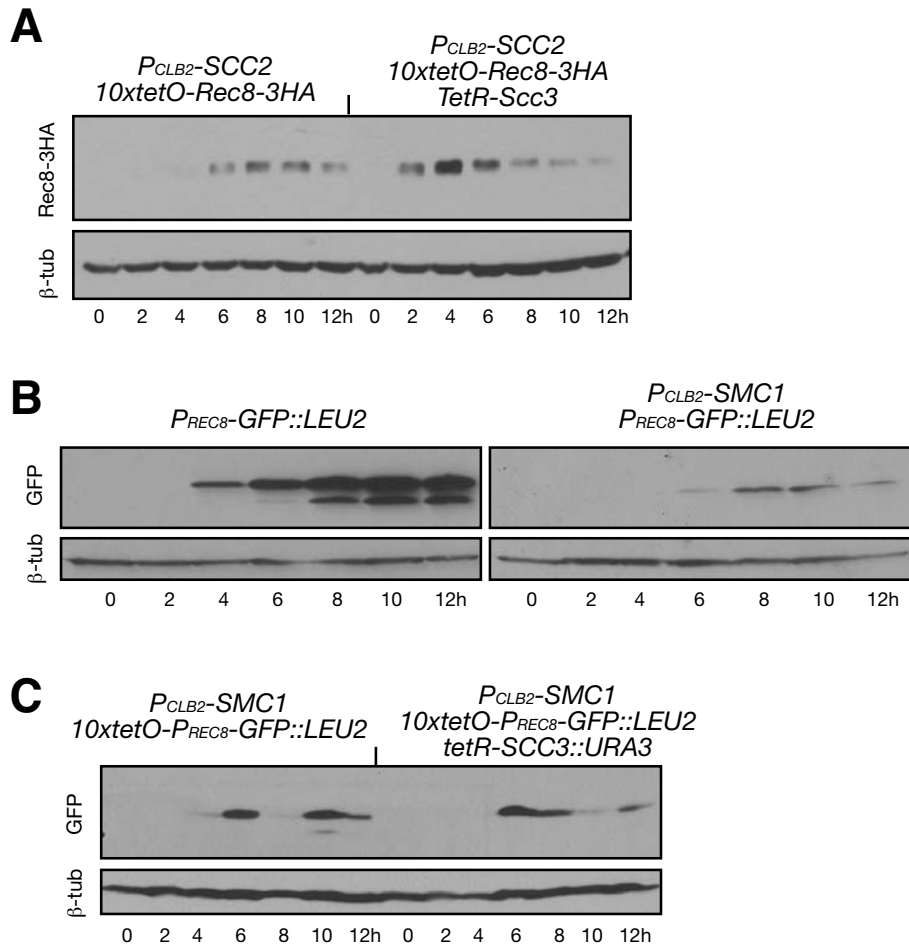

# Supplemental Figure 6

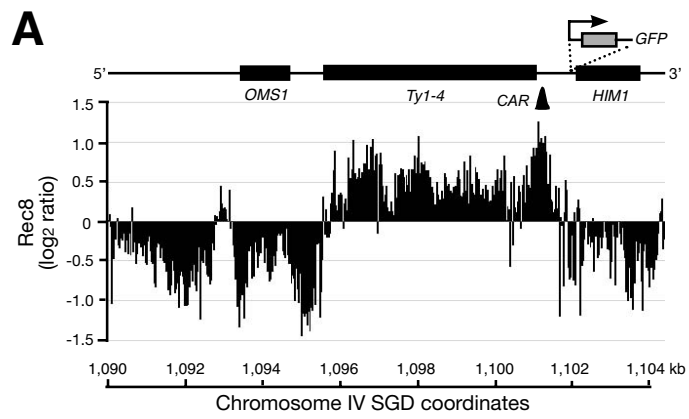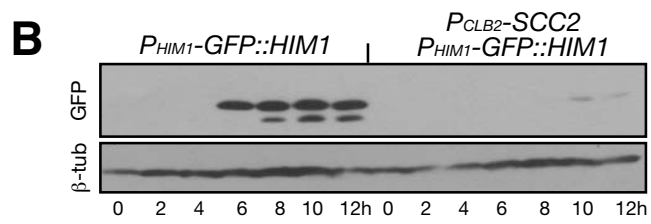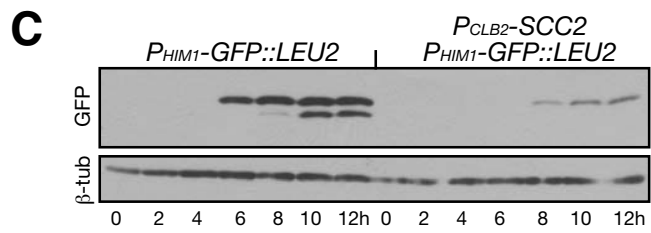

Supplement: E10-06-0545_1.pdf [file E10-06-0545_1.pdf]
